# Supplementary material for: Large-Scale Multiplexing Permits Full-Length Transcriptome Annotation of 32 Bovine Tissues From a Single Nanopore Flow Cell
Source: Front Genet. 2021 May 20;12:664260. doi: 10.3389/fgene.2021.664260 (PMC8173071; doi:10.3389/fgene.2021.664260)
Supplement: Supplementary file 7 [file Data_Sheet_7.xlsx]

## Sheet: Sheet1
# Top three expressed genes by sample
Sample	Abomasum_F1
Top 3 expressed genes	ENSBTAG00000026088	ENSBTAG00000046511	ENSBTAG00000014761
Official gene symbol	LYZ2	LYZ1	PGA5
Percent reads	0.268037	0.110346	0.0799492
Sample	Abomasum_M1
Top 3 expressed genes	ENSBTAG00000011424	ENSBTAG00000010799	ENSBTAG00000015441
Official gene symbol	TPM2	MYL6	ACTG2
Percent reads	0.0261228	0.0259195	0.0208033
Sample	Abomasum_M2
Top 3 expressed genes	ENSBTAG00000026088	ENSBTAG00000046511	ENSBTAG00000014761
Official gene symbol	LYZ2	LYZ1	PGA5
Percent reads	0.298927	0.104396	0.0716504
Sample	Adipose_F1
Top 3 expressed genes	ENSBTAG00000037526	ENSBTAG00000011666	ENSBTAG00000032774
Official gene symbol	FABP4	THRSP	ADIRF
Percent reads	0.0307071	0.0106503	0.00855136
Sample	Adipose_F2
Top 3 expressed genes	ENSBTAG00000037526	ENSBTAG00000011666	ENSBTAG00000008541
Official gene symbol	FABP4	THRSP	MGST1
Percent reads	0.0290066	0.0225066	0.0115087
Sample	Adipose_M1
Top 3 expressed genes	ENSBTAG00000037526	ENSBTAG00000021466	ENSBTAG00000013103
Official gene symbol	FABP4	COL3A1	COL1A1
Percent reads	0.0213351	0.016112	0.0151229
Sample	Adipose_M2
Top 3 expressed genes	ENSBTAG00000037526	ENSBTAG00000005654	ENSBTAG00000032774
Official gene symbol	FABP4	TMSB10	ADIRF
Percent reads	0.063197	0.0206779	0.0117212
Sample	Bladder_F1
Top 3 expressed genes	ENSBTAG00000015441	ENSBTAG00000010799	ENSBTAG00000011424
Official gene symbol	ACTG2	MYL6	TPM2
Percent reads	0.0320884	0.0318367	0.0187299
Sample	Bladder_M2
Top 3 expressed genes	ENSBTAG00000010799	ENSBTAG00000015441	ENSBTAG00000011424
Official gene symbol	MYL6	ACTG2	TPM2
Percent reads	0.0349428	0.0214678	0.015876
Sample	BoneMarrow_F1
Top 3 expressed genes	ENSBTAG00000037526	ENSBTAG00000005654	ENSBTAG00000055207
Official gene symbol	FABP4	TMSB10	SCD
Percent reads	0.0276078	0.0155179	0.00979802
Sample	BoneMarrow_F2
Top 3 expressed genes	ENSBTAG00000037526	ENSBTAG00000005654	ENSBTAG00000038488
Official gene symbol	FABP4	TMSB10	TMSB4X
Percent reads	0.0239606	0.0200147	0.01208
Sample	BoneMarrow_M1
Top 3 expressed genes	ENSBTAG00000037526	ENSBTAG00000005654	ENSBTAG00000055207
Official gene symbol	FABP4	TMSB10	SCD
Percent reads	0.0217659	0.0189762	0.0120391
Sample	BoneMarrow_M2
Top 3 expressed genes	ENSBTAG00000037526	ENSBTAG00000005654	ENSBTAG00000038488
Official gene symbol	FABP4	TMSB10	TMSB4X
Percent reads	0.0199854	0.0168134	0.00936051
Sample	BrainCortex_F1
Top 3 expressed genes	ENSBTAG00000016886	ENSBTAG00000025644	ENSBTAG00000011184
Official gene symbol	MT3	CALM1	FTH1
Percent reads	0.00826972	0.00757749	0.00662567
Sample	BrainCortex_F2
Top 3 expressed genes	ENSBTAG00000050274	ENSBTAG00000016886	ENSBTAG00000018115
Official gene symbol	novel gene	MT3	PEBP1
Percent reads	0.00929823	0.00853723	0.00758496
Sample	BrainCortex_M1
Top 3 expressed genes	ENSBTAG00000025644	ENSBTAG00000016886	ENSBTAG00000011184
Official gene symbol	CALM1	MT3	FTH1
Percent reads	0.0094101	0.0091243	0.00815971
Sample	Cecum_F1
Top 3 expressed genes	ENSBTAG00000033545	ENSBTAG00000015558	ENSBTAG00000010799
Official gene symbol	EBD	SPINK1	MYL6
Percent reads	0.0608703	0.0162082	0.0127453
Sample	Cecum_F2
Top 3 expressed genes	ENSBTAG00000033545	ENSBTAG00000015558	ENSBTAG00000026323
Official gene symbol	EBD	SPINK1	LYSB
Percent reads	0.0584266	0.0210927	0.0163354
Sample	Cecum_M1
Top 3 expressed genes	ENSBTAG00000033545	ENSBTAG00000032093	ENSBTAG00000005654
Official gene symbol	EBD	SPINK4	TMSB10
Percent reads	0.0878712	0.0191972	0.0117525
Sample	Cecum_M2
Top 3 expressed genes	ENSBTAG00000033545	ENSBTAG00000015558	ENSBTAG00000010799
Official gene symbol	EBD	SPINK1	MYL6
Percent reads	0.0624505	0.0142863	0.0129314
Sample	Cerebellum_F1
Top 3 expressed genes	ENSBTAG00000018115	ENSBTAG00000050274	ENSBTAG00000035998
Official gene symbol	PEBP1	novel gene	CKB
Percent reads	0.00559864	0.00528174	0.00507927
Sample	Cerebellum_F2
Top 3 expressed genes	ENSBTAG00000004777	ENSBTAG00000018115	ENSBTAG00000001489
Official gene symbol	S100B	PEBP1	TUBA1A
Percent reads	0.00720615	0.00709637	0.00602995
Sample	Cerebellum_M1
Top 3 expressed genes	ENSBTAG00000018115	ENSBTAG00000012788	ENSBTAG00000038488
Official gene symbol	PEBP1	COX6A1	TMSB4X
Percent reads	0.00705766	0.00456173	0.00440422
Sample	Cerebellum_M2
Top 3 expressed genes	ENSBTAG00000050274	ENSBTAG00000018115	ENSBTAG00000012788
Official gene symbol	novel gene	PEBP1	COX6A1
Percent reads	0.00736763	0.00614227	0.00505076
Sample	Colon_F1
Top 3 expressed genes	ENSBTAG00000037526	ENSBTAG00000005654	ENSBTAG00000008541
Official gene symbol	FABP4	TMSB10	MGST1
Percent reads	0.0406625	0.0111328	0.00906033
Sample	Colon_M1
Top 3 expressed genes	ENSBTAG00000033545	ENSBTAG00000030814	ENSBTAG00000032093
Official gene symbol	EBD	TFF2	SPINK4
Percent reads	0.0529333	0.032842	0.0274086
Sample	Colon_M2
Top 3 expressed genes	ENSBTAG00000033545	ENSBTAG00000030814	ENSBTAG00000032093
Official gene symbol	EBD	TFF2	SPINK4
Percent reads	0.0569205	0.0508245	0.015192
Sample	Duodenum_M1
Top 3 expressed genes	ENSBTAG00000030814	ENSBTAG00000038835	ENSBTAG00000047700
Official gene symbol	TFF2	GKN3P	novel gene
Percent reads	0.0372342	0.0229926	0.0194164
Sample	Esophagus_F1
Top 3 expressed genes	ENSBTAG00000008238	ENSBTAG00000046089	ENSBTAG00000007583
Official gene symbol	S100A7	KRT1	KRT14
Percent reads	0.0246109	0.0185836	0.0120687
Sample	Esophagus_F2
Top 3 expressed genes	ENSBTAG00000021218	ENSBTAG00000012638	ENSBTAG00000046944
Official gene symbol	MYLPF	S100A12	novel gene
Percent reads	0.0326173	0.0281663	0.022169
Sample	Esophagus_M1
Top 3 expressed genes	ENSBTAG00000021218	ENSBTAG00000009702	ENSBTAG00000046332
Official gene symbol	MYLPF	MYH8	ACTA1
Percent reads	0.0622932	0.060393	0.0367309
Sample	Esophagus_M2
Top 3 expressed genes	ENSBTAG00000021218	ENSBTAG00000046332	ENSBTAG00000011424
Official gene symbol	MYLPF	ACTA1	TPM2
Percent reads	0.0549102	0.0366593	0.026601
Sample	Heart_F1
Top 3 expressed genes	ENSBTAG00000018369	ENSBTAG00000008394	ENSBTAG00000005373
Official gene symbol	MYL2	MYL3	TPM1
Percent reads	0.049901	0.0382316	0.027062
Sample	Heart_F2
Top 3 expressed genes	ENSBTAG00000018369	ENSBTAG00000008394	ENSBTAG00000005373
Official gene symbol	MYL2	MYL3	TPM1
Percent reads	0.0469427	0.0456756	0.0268945
Sample	Heart_M1
Top 3 expressed genes	ENSBTAG00000018369	ENSBTAG00000008394	ENSBTAG00000005373
Official gene symbol	MYL2	MYL3	TPM1
Percent reads	0.0586582	0.0446461	0.0289326
Sample	Heart_M2
Top 3 expressed genes	ENSBTAG00000008394	ENSBTAG00000018369	ENSBTAG00000005373
Official gene symbol	MYL3	MYL2	TPM1
Percent reads	0.0447471	0.0401812	0.0227156
Sample	Hypothalamus_M1
Top 3 expressed genes	ENSBTAG00000011184	ENSBTAG00000016886	ENSBTAG00000004777
Official gene symbol	FTH1	MT3	S100B
Percent reads	0.00977527	0.00858517	0.0078629
Sample	Ileum_F1
Top 3 expressed genes	ENSBTAG00000033545	ENSBTAG00000048782	ENSBTAG00000005654
Official gene symbol	EBD	novel gene	TMSB10
Percent reads	0.0182413	0.0121334	0.0110337
Sample	Ileum_F2
Top 3 expressed genes	ENSBTAG00000005654	ENSBTAG00000001360	ENSBTAG00000038488
Official gene symbol	TMSB10	RPS12	TMSB4X
Percent reads	0.0122856	0.0108466	0.00962938
Sample	Isthmus_F1
Top 3 expressed genes	ENSBTAG00000001360	ENSBTAG00000015473	ENSBTAG00000015285
Official gene symbol	RPS12	RPS27A	RPS8
Percent reads	0.0115137	0.0112956	0.0103901
Sample	Isthmus_F2
Top 3 expressed genes	ENSBTAG00000001360	ENSBTAG00000015285	ENSBTAG00000015473
Official gene symbol	RPS12	RPS8	RPS27A
Percent reads	0.0139458	0.0120051	0.0108495
Sample	Jejunum_F1
Top 3 expressed genes	ENSBTAG00000017045	ENSBTAG00000010632	ENSBTAG00000048782
Official gene symbol	FABP2	FABP6	novel gene
Percent reads	0.0258946	0.0253815	0.0185526
Sample	Jejunum_F2
Top 3 expressed genes	ENSBTAG00000000198	ENSBTAG00000015558	ENSBTAG00000007135
Official gene symbol	novel gene	SPINK1	REG3G
Percent reads	0.0225802	0.0209063	0.0165236
Sample	Jejunum_M1
Top 3 expressed genes	ENSBTAG00000010632	ENSBTAG00000005654	ENSBTAG00000033545
Official gene symbol	FABP6	TMSB10	EBD
Percent reads	0.0611626	0.0215521	0.0164026
Sample	Jejunum_M2
Top 3 expressed genes	ENSBTAG00000010632	ENSBTAG00000033545	ENSBTAG00000048782
Official gene symbol	FABP6	EBD	novel gene
Percent reads	0.023167	0.0124129	0.0122944
Sample	Kidney_F1
Top 3 expressed genes	ENSBTAG00000009828	ENSBTAG00000048782	ENSBTAG00000010799
Official gene symbol	FXYD2	novel gene	MYL6
Percent reads	0.0134183	0.00763203	0.00762564
Sample	Kidney_F2
Top 3 expressed genes	ENSBTAG00000009828	ENSBTAG00000002559	ENSBTAG00000050274
Official gene symbol	FXYD2	MIOX	novel gene
Percent reads	0.0117507	0.0102658	0.00614431
Sample	Kidney_M1
Top 3 expressed genes	ENSBTAG00000009828	ENSBTAG00000048782	ENSBTAG00000015473
Official gene symbol	FXYD2	novel gene	RPS27A
Percent reads	0.0095744	0.00916683	0.0056992
Sample	Kidney_M2
Top 3 expressed genes	ENSBTAG00000009828	ENSBTAG00000010799	ENSBTAG00000003229
Official gene symbol	FXYD2	MYL6	RPL23
Percent reads	0.00937348	0.00868366	0.00701996
Sample	Liver_F1
Top 3 expressed genes	ENSBTAG00000009212	ENSBTAG00000017121	ENSBTAG00000006745
Official gene symbol	APOA2	ALB	FGG
Percent reads	0.0418849	0.0368746	0.0228138
Sample	Liver_F2
Top 3 expressed genes	ENSBTAG00000009212	ENSBTAG00000006745	ENSBTAG00000017121
Official gene symbol	APOA2	FGG	ALB
Percent reads	0.0468919	0.0399947	0.0344527
Sample	Liver_M2
Top 3 expressed genes	ENSBTAG00000009212	ENSBTAG00000017121	ENSBTAG00000006745
Official gene symbol	APOA2	ALB	FGG
Percent reads	0.047394	0.0286771	0.028095
Sample	Lung_F1
Top 3 expressed genes	ENSBTAG00000005654	ENSBTAG00000012560	ENSBTAG00000038488
Official gene symbol	TMSB10	SFTPC	TMSB4X
Percent reads	0.0267632	0.0172519	0.0169959
Sample	Lung_F2
Top 3 expressed genes	ENSBTAG00000005654	ENSBTAG00000048782	ENSBTAG00000038488
Official gene symbol	TMSB10	novel gene	TMSB4X
Percent reads	0.0404858	0.0194636	0.0183241
Sample	Lung_M1
Top 3 expressed genes	ENSBTAG00000001360	ENSBTAG00000004153	ENSBTAG00000012638
Official gene symbol	RPS12	SCGB3A2	S100A12
Percent reads	0.0126183	0.011041	0.011041
Sample	Lung_M2
Top 3 expressed genes	ENSBTAG00000005654	ENSBTAG00000038488	ENSBTAG00000048782
Official gene symbol	TMSB10	TMSB4X	novel gene
Percent reads	0.0367061	0.0192249	0.015747
Sample	Mammary_F1
Top 3 expressed genes	ENSBTAG00000039787	ENSBTAG00000002632	ENSBTAG00000001360
Official gene symbol	CSN3	CSN2	RPS12
Percent reads	0.0225746	0.0196985	0.0120642
Sample	Mammary_F2
Top 3 expressed genes	ENSBTAG00000001360	ENSBTAG00000015473	ENSBTAG00000003229
Official gene symbol	RPS12	RPS27A	RPL23
Percent reads	0.0117727	0.00962486	0.00925834
Sample	Muscle_M1
Top 3 expressed genes	ENSBTAG00000021218	ENSBTAG00000046332	ENSBTAG00000007090
Official gene symbol	MYLPF	ACTA1	MYH2
Percent reads	0.0787529	0.0526581	0.0434133
Sample	Muscle_M2
Top 3 expressed genes	ENSBTAG00000021218	ENSBTAG00000018369	ENSBTAG00000046332
Official gene symbol	MYLPF	MYL2	ACTA1
Percent reads	0.0481368	0.0463574	0.0436283
Sample	Omasum_F1
Top 3 expressed genes	ENSBTAG00000012638	ENSBTAG00000051812	ENSBTAG00000046944
Official gene symbol	S100A12	novel gene	novel gene
Percent reads	0.0641086	0.0215261	0.0195255
Sample	Omasum_F2
Top 3 expressed genes	ENSBTAG00000012638	ENSBTAG00000015441	ENSBTAG00000010799
Official gene symbol	S100A12	ACTG2	MYL6
Percent reads	0.0325541	0.0184251	0.0183736
Sample	Omasum_M1
Top 3 expressed genes	ENSBTAG00000012638	ENSBTAG00000037651	ENSBTAG00000018320
Official gene symbol	S100A12	S100A2	RPLP1
Percent reads	0.0312837	0.0312238	0.0104567
Sample	Omasum_M2
Top 3 expressed genes	ENSBTAG00000012638	ENSBTAG00000051812	ENSBTAG00000037651
Official gene symbol	S100A12	novel gene	S100A2
Percent reads	0.0543785	0.0295103	0.0282818
Sample	Ovary_F1
Top 3 expressed genes	ENSBTAG00000015473	ENSBTAG00000001360	ENSBTAG00000003229
Official gene symbol	RPS27A	RPS12	RPL23
Percent reads	0.0162592	0.0133517	0.0123627
Sample	Ovary_F2
Top 3 expressed genes	ENSBTAG00000003229	ENSBTAG00000001360	ENSBTAG00000015473
Official gene symbol	RPL23	RPS12	RPS27A
Percent reads	0.0148936	0.0141786	0.0138601
Sample	Reticulum_F1
Top 3 expressed genes	ENSBTAG00000012638	ENSBTAG00000037651	ENSBTAG00000051812
Official gene symbol	S100A12	S100A2	novel gene
Percent reads	0.0620022	0.0239134	0.0217167
Sample	Reticulum_F2
Top 3 expressed genes	ENSBTAG00000012638	ENSBTAG00000051812	ENSBTAG00000037651
Official gene symbol	S100A12	novel gene	S100A2
Percent reads	0.0504658	0.0196242	0.0175376
Sample	Reticulum_M1
Top 3 expressed genes	ENSBTAG00000012638	ENSBTAG00000037651	ENSBTAG00000051812
Official gene symbol	S100A12	S100A2	novel gene
Percent reads	0.0589432	0.023373	0.0230227
Sample	Reticulum_M2
Top 3 expressed genes	ENSBTAG00000012638	ENSBTAG00000051812	ENSBTAG00000037651
Official gene symbol	S100A12	novel gene	S100A2
Percent reads	0.0578972	0.0269952	0.0229097
Sample	Rumen_F1
Top 3 expressed genes	ENSBTAG00000012638	ENSBTAG00000051812	ENSBTAG00000037651
Official gene symbol	S100A12	novel gene	S100A2
Percent reads	0.0534463	0.0207496	0.0183602
Sample	Rumen_F2
Top 3 expressed genes	ENSBTAG00000012638	ENSBTAG00000037651	ENSBTAG00000051812
Official gene symbol	S100A12	S100A2	novel gene
Percent reads	0.0595933	0.0178868	0.0162919
Sample	Rumen_M1
Top 3 expressed genes	ENSBTAG00000012638	ENSBTAG00000037651	ENSBTAG00000051812
Official gene symbol	S100A12	S100A2	novel gene
Percent reads	0.0530785	0.0198127	0.0156975
Sample	Rumen_M2
Top 3 expressed genes	ENSBTAG00000012638	ENSBTAG00000012640	ENSBTAG00000051812
Official gene symbol	S100A12	S100A8	novel gene
Percent reads	0.0829074	0.0267105	0.0190781
Sample	Skin_F1
Top 3 expressed genes	ENSBTAG00000012638	ENSBTAG00000046944	ENSBTAG00000021218
Official gene symbol	S100A12	novel gene	MYLPF
Percent reads	0.060502	0.0499887	0.0229339
Sample	Skin_M2
Top 3 expressed genes	ENSBTAG00000008238	ENSBTAG00000037651	ENSBTAG00000007583
Official gene symbol	S100A7	S100A2	KRT14
Percent reads	0.0126115	0.0119816	0.0104461
Sample	Spleen_F1
Top 3 expressed genes	ENSBTAG00000005654	ENSBTAG00000055240	ENSBTAG00000038488
Official gene symbol	TMSB10	novel gene	TMSB4X
Percent reads	0.0245538	0.0156935	0.0132749
Sample	Spleen_F2
Top 3 expressed genes	ENSBTAG00000005654	ENSBTAG00000048782	ENSBTAG00000026199
Official gene symbol	TMSB10	novel gene	ACTB
Percent reads	0.0557942	0.0212671	0.011828
Sample	Spleen_M1
Top 3 expressed genes	ENSBTAG00000005654	ENSBTAG00000048782	ENSBTAG00000026199
Official gene symbol	TMSB10	novel gene	ACTB
Percent reads	0.0525256	0.0158128	0.0128506
Sample	Spleen_M2
Top 3 expressed genes	ENSBTAG00000005654	ENSBTAG00000048782	ENSBTAG00000001360
Official gene symbol	TMSB10	novel gene	RPS12
Percent reads	0.0311691	0.0179315	0.0121568
Sample	Testis_M1
Top 3 expressed genes	ENSBTAG00000021493	ENSBTAG00000016147	ENSBTAG00000017246
Official gene symbol	PRM1	CETN4	UBB
Percent reads	0.0249296	0.00855101	0.00843131
Sample	Testis_M2
Top 3 expressed genes	ENSBTAG00000021493	ENSBTAG00000025775	ENSBTAG00000017246
Official gene symbol	PRM1	INSL3	UBB
Percent reads	0.0263297	0.0137377	0.00739636
Sample	Thymus_F2
Top 3 expressed genes	ENSBTAG00000015473	ENSBTAG00000003229	ENSBTAG00000052337
Official gene symbol	RPS27A	RPL23	RPS29
Percent reads	0.0235601	0.0171118	0.0132202
Sample	Thymus_M1
Top 3 expressed genes	ENSBTAG00000015473	ENSBTAG00000005654	ENSBTAG00000048782
Official gene symbol	RPS27A	TMSB10	novel gene
Percent reads	0.0131965	0.0130975	0.0101264
Sample	Thymus_M2
Top 3 expressed genes	ENSBTAG00000005654	ENSBTAG00000015473	ENSBTAG00000001360
Official gene symbol	TMSB10	RPS27A	RPS12
Percent reads	0.0143846	0.0103809	0.00950642
Sample	Thyroid_M1
Top 3 expressed genes	ENSBTAG00000038488	ENSBTAG00000005654	ENSBTAG00000012638
Official gene symbol	TMSB4X	TMSB10	S100A12
Percent reads	0.0173267	0.0163321	0.0153669
Sample	Thyroid_M2
Top 3 expressed genes	ENSBTAG00000005654	ENSBTAG00000038488	ENSBTAG00000001360
Official gene symbol	TMSB10	TMSB4X	RPS12
Percent reads	0.0162801	0.0150732	0.0143927
Sample	Trachea_F1
Top 3 expressed genes	ENSBTAG00000004153	ENSBTAG00000010799	ENSBTAG00000025952
Official gene symbol	SCGB3A2	MYL6	novel gene
Percent reads	0.0192288	0.0170539	0.0158385
Sample	Trachea_F2
Top 3 expressed genes	ENSBTAG00000004153	ENSBTAG00000010799	ENSBTAG00000048171
Official gene symbol	SCGB3A2	MYL6	TAP
Percent reads	0.0205659	0.0164491	0.0164455
Sample	Trachea_M2
Top 3 expressed genes	ENSBTAG00000004153	ENSBTAG00000025952	ENSBTAG00000039446
Official gene symbol	SCGB3A2	novel gene	novel gene
Percent reads	0.272691	0.147795	0.0482446
Sample	UterineEndometrium_F1
Top 3 expressed genes	ENSBTAG00000001360	ENSBTAG00000015473	ENSBTAG00000015285
Official gene symbol	RPS12	RPS27A	RPS8
Percent reads	0.0212452	0.0184638	0.0175683
Sample	UterineEndometrium_F2
Top 3 expressed genes	ENSBTAG00000015473	ENSBTAG00000001360	ENSBTAG00000003229
Official gene symbol	RPS27A	RPS12	RPL23
Percent reads	0.0139664	0.0131709	0.012246
Sample	UterineMyometrium_F1
Top 3 expressed genes	ENSBTAG00000015473	ENSBTAG00000001360	ENSBTAG00000003229
Official gene symbol	RPS27A	RPS12	RPL23
Percent reads	0.0213007	0.0173238	0.0154394
